# Supplementary figures and images for: Screening for Selective Anticancer Activity of 65 Extracts of Plants Collected in Western Andalusia, Spain
Source: MDPI journal article supplement (doi:10.3390/plants10102193), 2021-10-15

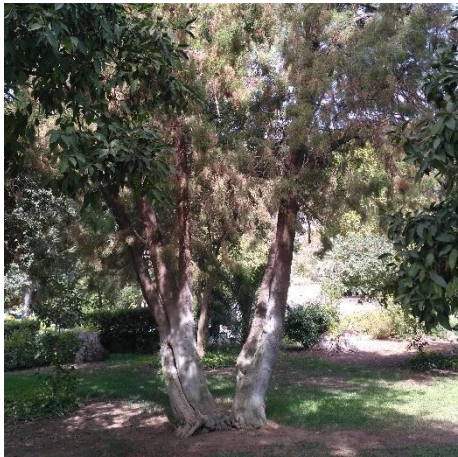

(a)

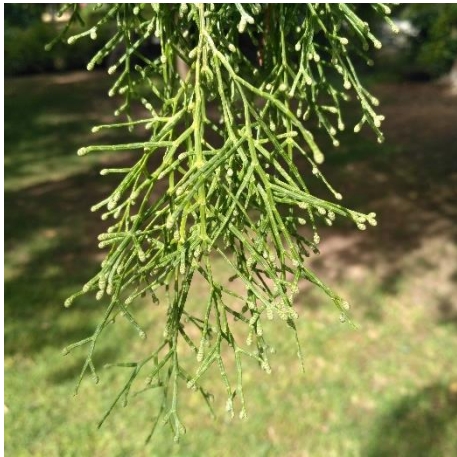

(b)

Supplement: s1 [file s1]

58

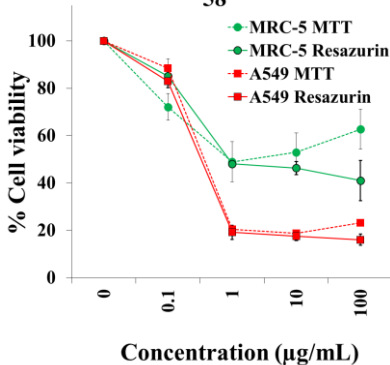

Supplement: s1 [file s1]
